# Supplementary material
Source: Springer Nature journal article supplement (https://www.springermedizin.de/resource/supplementary/12943_2012_1074_MOESM1_ESM.pdf/9552202)

A

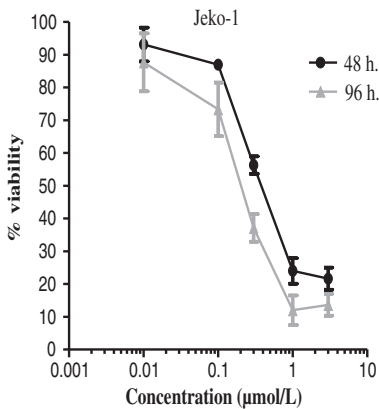

B

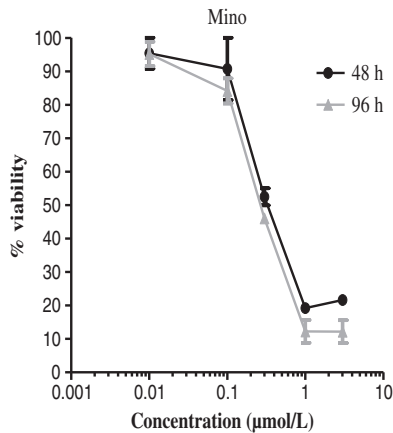

C

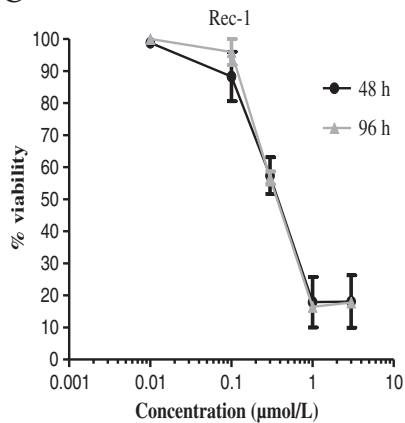

Supplement: MOESM1 [file 9552202]
